# Supplementary material
Source: publisher figshare collection journal article supplement (https://frontiersin.figshare.com/ndownloader/files/34316687)
Supplement: Supplementary file 1 [file 34316687]

Table 2: Fishery Performance Indicators: Outputs (Triple bottom line (TBL))

| **Output Indicators by TBL** | **Dimension** | **Metric** | **Score** | **Average** |
| --- | --- | --- | --- | --- |
| ECOLOGY | Stock Health | Proportion of Harvest with a 3rd Party Certification | 1 | 1.7 |
| Percentage of Overfished Stocks | 3 |
| Overfishing or Rebuilding | 1 |
| Regulatory Mortality | 1 |
| Selectivity | 1 |
| Illegal, Unregulated, or Unreported Landings | 1 |
| Status of Critical Habitat | 4 |
| ECONOMICS | Harvest | Landings Level | 4 | 4.3 |
| Excess Capacity | 5 |
| Season Length | 3 |
| Ex-vessel Price versus Historic High | 5 |
| Harvest Assets | Ratio of Asset Value to Gross Earnings | 2 | 2.3 |
| Total Revenue versus Historic High | 1 |
| Asset (Permit, Quota) Value versus Historic High | 1 |
| Borrowing Rate Relative to Risk-free Rate | 4 |
| Source of Capital | 3 |
| Functionality of Harvest Capital | 3 |
| Risk | Annual Total Revenue Volatility | 2 | 3.0 |
| Annual Landings Volatility | 2 |
| Intra-annual Landings Volatility | 3 |
| Annual Price Volatility | 4 |
| Intra-annual Price Volatility | 5 |
| Spatial Price Volatility | 2 |
| Trade | International Trade | 4 | 3.3 |
| Final Market Wealth | 5 |
| Wholesale Price Relative to Similar Products | 3 |
| Capacity of Firms to Export to the US & EU | 1 |
| Product Form | Final Market Use | 4 | 3.8 |
| Ex-vessel to Wholesale Marketing Margins | 3 |
| Processing Yield | 4 |
| Shrink | 5 |
| Capacity Utilization Rate | 5 |
| Product Improvement | 2 |
| Post-Harvest Asset Performance | Borrowing Rate Relative to Risk-free Rate | 3 | 2,3 |
| Source of Capital | 3 |
| Age of Facilities | 1 |
| COMMUNITY | Managerial Returns | Earnings Compared to National Average Earnings | 5 | 4.0 |
| Fishery Wages Compared to Non-fishery Wages | 5 |
| Social Standing of Boat Owners and Permit Holders | 4 |
| Earnings Compared to National Average Earnings | 5 |
| Manager Wages Compared to Non-fishery Wages | 3 |
| Social Standing of Processing Workers | 2 |
| Labor Returns | Earnings Compared to National Average Earnings | 4 | 3.2 |
| Fishery Wages Compared to Non-fishery Wages | 4 |
| Social Standing of Crew | 3 |
| Earnings Compared to National Average Earnings | 3 |
| Worker Wages Compared to Non-fishery Wages | 3 |
| Social Standing of Processing Workers | 2 |
| Health & Sanitation | Harvest Safety | 5 | 3.8 |
| Access to Healthcare | 4 |
| Access to Healthcare | 4 |
| Sanitation | 4 |
| Access to Healthcare | 4 |
| Access to Healthcare | 2 |
| Community Services | Contestability & Legal Challenges | 4 | 4.2 |
| Education Access | 5 |
| Education Access | 4 |
| Regional Support Businesses | 4 |
| Education Access | 5 |
| Education Access | 3 |
| Local Ownership | Proportion of Nonresident Employment | 5 | 4.5 |
| Nonresident Ownership of Processing Capacity | 4 |
| Local Labor | Proportion of Nonresident Employment (Crew) | 5 | 5.0 |
| Proportion of Nonresident Employment  (Processing Workers) | 5 |
| Career | Crew Experience | 5 | 4.0 |
| Age Structure of Harvesters | 4 |
| Worker Experience | 3 |
